# Supplementary material
Source: HighWire-hosted journal article supplement (https://bmjopenquality.bmj.com/content/9/3/e000915)
Supplement: inline-supplementary-material-1 [file inline-supplementary-material-1.xlsx]

## Sheet: DE Sheet
Legend
?	Missing Data; Not reported, authors did not respond
	Data reported upon contact with author
	Modified - converted from MEAN/SD or MEDIAN/IQR (if median/iqr-->mean, SD = (median-(IQR1+IQR3)/2)
Supplementary Table 1: Data extracted from individual studies, including quality assessment. See legend above for colouring scheme.
General Data																	SubGroups								PRE-INTERVENTION						POST-INTERVENTION
Study Code	First Author Name	Publication Year	Journal	Publication Type	Start Date	Duration (dates)	Duration (months)	Study Type	Intervention Type	Intervention Codes**	Combination Intervention Codes	Total Number of Interventions (Combination Only)	Non-Target Subtype	Community (HC) or Teaching (HT) Hospital?	Health Practictioner Type (ED, Neuro, Not described (ND))?	Stroke Centre Designation? (Primary = P, Comprehensive = C, None = N)	Pre-Hospital Activation	Single-centre (SC) or Multi-centre (MC)	If Multi-Centre, how many locations?	Multinational (ML) or single nation (Country)?	Telemedicine Employed (Y/N)	Combination of Interventions (CI) or Single Intervention (SI)	Sample	Sex [M/F, as reported]	DTN (mean; in minutes)	SD (minutes)	DTN (median; in minutes)	IQR	Sample	Sex [M/F; as reported]	DTN (mean; in minutes)	SD (minutes)	DTN (median; in minutes)	IQR
820	Sung	2011	Stroke Research and Treatment	Journal Article	2009-10-01	10/2009-09/2010	12	Uncontrolled Pre/Post	COMB	13	2, 12	2	Human Resources - Hiring dedicated nurses	HC	Emergency	N	N	SC		Taiwan	N	CI	40	12 F	71.75	22.95	68.5	57-83	21	9 F	60.85	13.86	58	54-69
823	Bae	2010	Journal of Clinical Neurology	Journal Article	2008-12-01	12/2008-08/2009	8	Uncontrolled Pre/Post	PREH	1				HC	ND	N	Y	SC		Korea	N	SI	33	17 M	42.1	18.1	42.1	24-60.2	18	14 M	29.7	9.6	29.7	39.3
832	Chen	2014	PLOS One	Journal Article	2006-06-01	06/2006-07/2013	85	Uncontrolled Pre/Post	RTPR	3				HT	Neurology	N	N	SC		Taiwan	N	SI	91	59 M	89.6	27.5	88	67-107	216	122 M	56.4	22	51	43-64
846	Shah	2015	Neurology	Journal Article	2012-01-01	01/2012-12/2013	24	Uncontrolled Pre/Post	COMB	13	2, 11 ,12	3	Recognition of high-performing units/staff	HC	ND	P, C	N	MC		USA	N	CI	23	47.8% F	93	9.62963	93	77-103	39	57.5% F	55	11.1111	55	46.5-76.5
854	Dirks	2015	Neurology	Journal Article	2005-10-01	10/2005-06/2012	92	RCT	NTGT	12			Active blood-pressure management	HC	ND	N	N	MC		Netherlands	N	SI	158	73 M	70	42	60	45-85	66	39 M	68	30	60	47-85
855	Ashkenazi	2015	Medicine (Baltimore)	Journal Article	2011-08-01	08/;2011-10/2012	15	Uncontrolled Pre/Post	NTGT	12			Companions/family present; Various levels, minimum (1 companion) reported as exposure	HT	ND	N	Y	SC		Israel	N	SI	73	32 M	137	60	137	89-251	291	58 M	122	50.7407	122	75-212
862	Sohn	2015	Journal of Stroke & Cerebrov. Dis.	Journal Article	2007-01-01	01/2007-05/2013	76	Uncontrolled Pre/Post	RTPR	3				HC	ND	N	N	SC		Korea	N	SI	71	48 M	49.3	22.3	48	32-62	252	145 M	32.7	14.9	30.5	22-40
865	Kendall	2015	Emergency Medicine Journal	Journal Article	2012-08-01	08/2012-01/2013	5	Uncontrolled Pre/Post	COMB	13	1, 2, 3, 4, 5, 6	6		HC	Neurology	N	N	MC	7	UK	Y	CI	136	51.9% M	76.2	32.3	72	52.5-91.5	215	49.2% M	65.6	33.7	59	42.25-77.75
869	Willeit	2015	Lancet Neurology	Journal Article	2010-01-01	01/2010-12/2013	48	Uncontrolled Pre/Post	STTL	2				HC	Emergency	N	N	MC	8	Australia	Y	SI	1238	53.6% M	54.13	33.67	49	35-60	1266	53.4% M	47.57	26.1	44	22-60
874	Hsieh	2014	Journal of the Formosan Medical Association	Journal Article	2016-01-09	01/2009-01/2012	36	Uncontrolled Pre/Post	NTGT	12			Tech; Video-assisted informed consent delivery to family/companions	HC	ND	P	N	SC		Taiwan	N	SI	18	67% M	93	24	93	69-117	14	57% M	57	14	57	43 - 71
876	Van Shaik	2014	Journal of Stroke & Cerebrov. Dis.	Journal Article	2007-01-01	01/2007-12/2012	72	Uncontrolled Pre/Post	COMB	13	1, 3, 6, 7, 9	5		HC	Neurology	N	N	SC		Netherlands	N	CI	41	22 M	60.27	29.89	60	41-65	185	107 M	31.08	21.02	25	20-37
879	Burnett	2014	Stroke	Journal Article	2008-01-01	01/2008-04/2014	87	Uncontrolled Pre/Post	FEED	11				HC	ND	N	N	SC		USA	N	SI	94	48 F	82	12.963	82	68-103	108	58 F	56	10	56	44-71
884	Thortveit	2014	Acta Neurologica Scandinavica	Journal Article	2007-01-01	01/2007-12/2011	60	Uncontrolled Pre/Post	ATPA	9				HC	ND	N	N	SC		Norway	N	SI	82	39% F	46	6.5	36	30, 50	156	48% F	36	4	28	22, 41
929	Ruff	2014	Stroke	Journal Article	2003-01-01	01/2003-12/2011	108	Uncontrolled Pre/Post	COMB	13	1, 2, 3, 4, 6, 7, 8, 9, 10, 11	10		HC	ND	N	N	SC		USA	N	CI	1413	53.5% M	70	10.7407	70	56-85	925	52.1% M	47	11.1111	47	32 - 62
987	Casolla	2013	Journal of Neurology	Journal Article	2008-10-01	10/2008-07/2011	45	Uncontrolled Pre/Post	PREH	1				HT	ND	N	Y	SC		France	N	SI	56	?	63	17.037	63	51-97	191	?	49	8.51852	49	39-62
995	Tai	2012	Internal Medicine Journal	Journal Article	2003-01-01	01/2003-12/2010	84	Uncontrolled Pre/Post	RTPR	3				HC	ND	N	Y	SC		Australia	N	SI	96	55 M	90	12.4815	90	77.3-111	189	105 M	72	15.9259	72	50.5-93.5
996	Ford	2012	Stroke	Journal Article	2009-01-01	01/2009-03/2012	51	Controlled Pre/Post	FEED	11				HC	Neurology	N	N	SC		USA	N	SI	132	52% F	66	32	60	46-73	87	56% F	44	21	39	28-56
1003	Ghrooda	2012	Canadian Journal of Neurological Sciences	Journal Article	2008-01-01	01/2008-12/2011	48	Uncontrolled Pre/Post	FEED	11				HC	ND	N	N	SC		Canada	N	SI	28	50% M	74.8	23.8	69	57.8, 88.5	58	51.7% M	50.6	18	49	36, 66
1015	Meretoja	2012	Neurology	Journal Article	1995-06-01	06/1995-06/2011	193	Uncontrolled Pre/Post	COMB	13	1, 3, 6, 7, 8, 9, 12	7		HT	ND	N	Y	SC		Finland	N	CI	7	?	105	20.3704	105	65-120	167	?	28	4.44444	28	25-37
1016	Lin	2012	Circulation. Cardiovascular Quality & Outcomes	Journal Article	2003-04-01	04/2003-03/2011	107	Database MA	PREH	1				HT	ND	C+P	Y	MC	?	ML	N	SI	122791	45.7% M	80	23.3333	80	60-103	249197	46.6% M	76	14.8148	78	60-100
1106	Puolakka	2010	Academic Emergency Medicine	Journal Article	2003-01-01	01/2003-12/2005	36	Uncontrolled Pre/Post	COMB	13	1, 11	2		HC	ND	N	N	SC		Finland	N	CI	58	33 M	67	15.1852	67	49-90	149	78 M	34	9.25926	34	22-47
1108	Heo	2010	Stroke	Journal Article	2008-03-01	03/2008-09/2008	7	Uncontrolled Pre/Post	COMB	13	2, 3	2		HC	Neurology	N	N	MC	10	Korea	N	CI	199	125 M	71.7	33.6	67	48-86	312	189 M	56.6	26.9	48.5	40-66
1119	Yoo	2010	Journal of the Neurological Sciences	Journal Article	2004-03-01	03/2004-03/2007	48	Controlled Pre/Post	NTGT	12				HC	ND	N	N	SC		Korea	N	SI	43	28 M	100	50.7407	100	30-167	46	25 M	50	53.7037	50	16-161
1134	Kim	2009	European Journal of Neurology	Journal Article	2006-10-01	10/2006-05/2007	7	Uncontrolled Pre/Post	PREH	1				HT	ND	N*	Y	SC		Korea	N	SI	44	28 M	48.6	23.3	48.6	25.3-71.9	47	33 M	34.8	17.7	34.8	17.1-52.5
1151	Tveiten	2009	Emergency Medicine Journal	Journal Article	2003-01-01	01/2003-12/2007	60	Uncontrolled Pre/Post	COMB	13	2, 3, 5	3		HC	Neurology	N	N	SC		Norway	N	CI	5	3 F	71	28	53	45 - 78	18	7 F	38	11	38	30-42
1162	Nazir	2009	Journal of Clinical Neuroscience	Journal Article	2005-01-01	01/2005-12/2005	12	Uncontrolled Pre/Post	COMB	13	1, 3, 10	3		HC	ND	N	N	SC		USA	N	CI	10	?	80.5	5.92593	80.5	77.25-93.25	27	?	70.5	18.1481	70.5	47.25-96.25
1223	Lindsberg	2006	Neurology	Journal Article	1999-01-01	01/1999-12/2004	72	Uncontrolled Pre/Post	COMB	13	1, 10, 12	3		HC	Neurology	N	Y	SC		Finland	N	CI	17	?	88	7	88	81-95	50	?	50	3	50	47-53
1224	Mehdiratta	2006	Canadian Journal of Neurological Sciences	Journal Article	1996-05-01	05/1996-11/2002	90	Controlled Pre/Post	RTPR	3				HC	ND	N	N	SC		Canada	N	SI	87	?	86.2	40.1	86.2	46.1-126.3	47	?	77.9	27.15	77.9	50.75-105.05
2976	Moran	2016	Journal of Stroke & Cerebrov. Dis.	Journal Article	2009-07-01	07/2009-03/2014	68	Uncontrolled Pre/Post	NTGT	12				HC	Neurology	P	N	SC		USA	N	SI	44	20 F	68.5	38.9	53	45-73	122	62 F	49.5	21.8	45	35-58
3145	Bhatt	2012	The Neurohospitalist	Journal Article	2009-07-01	07/2009-09/2011	38	Uncontrolled Pre/Post	NTGT	12				HC	ND	P	N	SC		USA	N	SI	60	29 F	93	24	93	69 - 117	47	25 F	68	18	68	50 - 86
3472	Prabhakaran	2016	Circulation. Cardiovascular Quality & Outcomes	Journal Article	2010-01-01	01/2010-03/2015	63	Controlled Pre/Post	FEED	11				HC	Neurology	P	N	MC	15	USA	N	SI	366	46.5% F	82	71.1111	82	13-205	400	49.8% F	58	68.8889	58	14-202
3477	Zaidi	2016	Journal of Neurointerventional Surgery	Journal Article	2015-01-01	01/2015-06/2015	6	Uncontrolled Pre/Post	COMB	13	2, 3	2		HC	Neurology	P	N	MC		USA	N	CI	142	50% F	75	16.6667	75	60-95	109	56% F	46	9.25926	46	28-55
3480	Liang	2016	Australasian Physical and Engineering Sciences	Journal Article	2014-04-01	04/2014-06/2015	14	Uncontrolled Pre/Post	FEED	11				HC	Emergency	N	N	SC		China	N	SI	13	15.38% F	90	24.0741	90	60-125	20	25% F	47	7.77778	47	40-61
3484	Saber	2016	Neurology	Journal Article	2006-08-01	08/2006-04/2012	68	RCT	IMAG	6				HC	ND	N	N	MC		ML	N	SI	243	52.3% M	75.8	30.1	75.8	45.7-106.9	372	50% M	58.3	29.3	58.3	29 - 87.6
3486	Belt	2016	Stroke	Journal Article	2015-01-01	01/2015-03/2016	14	Uncontrolled Pre/Post	COMB	13	1, 2	2		HC	Emergency	C+P	Y	MC		USA	Y	CI	43	?	40	6.5	40	33.5-46.5	15	?	28	8	28	20 - 36
3493	Kim	2016	Journal of Stroke & Cerebrov. Dis.	Journal Article	2012-01-01	01/2012-08/2015	44	Uncontrolled Pre/Post	PREH	1				HC	Neurology	C	Y	SC		Korea	N	SI	28	36.9% F	29	7.5	29	23-38	187	39.3% F	20	10	20	15-35
3498	Ibrahim	2016	Journal of Stroke & Cerebrov. Dis.	Journal Article	2008-01-01	01/2008-06/2015	90	Uncontrolled Pre/Post	STTL	2				HC	ND	N	N	SC		Canada	N	SI	102	80.4% M	83.26	47.7	83.26	35.56-130.96	102	82.4% M	47.09	25.7	47.09	21.39 - 72.79
3499	de Seabra Marto	2016	Journal of Stroke & Cerebrov. Dis.	Journal Article	2015-01-01	01.2015-12/2015	12	Uncontrolled Pre/Post	NTGT	12				HT	Neurology	N	N	SC		Portugal	N	SI	30	52.5% M	52.7	25.7	52.7	27-78.4	41	38.7% M	39.2	14.2	39.2	25 - 53.4
3509	Puy	2017	American Journal of Emergency Medicine	Journal Article	2013-10-01	10/2013-092015	24	Uncontrolled Pre/Post	COMB	13	12, 12, 12	3	All medical departments brought to same site (ED consolidation)	HT	Neurology	N	N	MC	2	France	N	CI*	39	48.7% M	77.84	30.97	77.84	46.87 - 108.81	62	59.7% M	71.32	31.82	71.32	39.5 - 103.14
3516	Kamal	2017	Circulation, Cardiovascular Quality & Outcomes	Journal Article	2012-06-01	06/2012-06/2013	12	Uncontrolled Pre/Post	COMB	13	2, 3, 9	3		HT	Neurology	N	Y	SC		Canada	N	CI*	94	?	53	11.4815	53	40-71	213	?	45	10.3704	45	34-62
3516	Kamal	2017	Circulation, Cardiovascular Quality & Outcomes	Journal Article	2012-06-01	06/2013-01/2015	1	Uncontrolled Pre/Post	DTCT	5				HT	Neurology	N	Y	SC		Canada	N	SI	213	?	45	10.3704	45	34-62	43	?	35	9.25926	35	27-52
3527	Chen	2016	Canadian Journal of Neurological Sciences	Journal Article	2012-01-01	01/2012 - 03/2015	42	Uncontrolled Pre/Post	COMB	13	3, 4, 5, 6, 7, 9, 11, 12	8	Team-member validation	HT	Neurology	N	Y	SC		Canada	N	CI	48	58.3% F	75	12.5926	75	60-94	58	41.4% F	46	9.62963	46	33-59
92	Busby	2016	Journal of Neurointerventional Surgery	Journal Article	2014-02-01	02/2014 - 02/2015	12	Uncontrolled Pre/Post	PREH	1				HC	Emergency	C	Y	SC		USA	N	SI	41	68% M	62	10.3704	62	49 - 77	52	48% M	25	6.66667	25	18 - 36
100	Heikkila	2016	Scandanavian Journal of Trauma, Resuscitation and Emergency Medicine	Journal Article	2012-01-01	01/2012-12/2013	24	Uncontrolled Pre/Post	COMB	13	2, 10, 12	3	Education/introduction of emergency medicine as a specialty	HC	Emergency	N	N	SC		Finland	N	CI	31	?	54	35.9259	54	34 - 131	33	?	20	19.2593	20	8 - 60
87	Hsieh	2016	PLOS One	Journal Article	2006-05-01	05/2006 - 07/2011	38	Uncontrolled Pre/Post	COMB	13	10, 11, 12	3	Education	HC	Neurology	N	N	MC	28	Taiwan	N	CI	345 (Calculated)	?	68.14	10.31	68.14	57.83 - 78.45	193 (Calculated)	?	64.98	4.19	64.98	60.77 - 69.15
101	Hsieh	2016	Scandanavian Journal of Trauma, Resuscitation and Emergency Medicine	Journal Article	2012-09-01	09/2012 - 12/2014	27	Uncontrolled Pre/Post	PREH	1				HC	Neurology	N	Y	SC		Taiwan	N	SI	201	51.7% M	68	11.8519	68	54 - 86	727	64.5% M	63	11.1111	63	49 - 79
102	Huang	2016	PLOS One	Journal Article	2011-03-01	03/2011 - 04/2015	50	Controlled Pre/Post	COMB	13	2, 11, 12	3	Target-setting, systematic literature review	HC	ND	N	N	SC		China	N	CI	202	25.2% F	116	15.5556	116	93 - 135	146	26.7% F	53	15.9259	53	43 - 86
118A	Sakamoto	2016	Journal of Neurological Sciences	Journal Article	2014-01-01	01/2014 - 02/2015	14	Uncontrolled Pre/Post	COMB	13	1, 6, 12	3	24/7 Neurospecialist care	HT	Neurology	N	Y	SC		Japan	N	CI	19	37% F	83	12.963	83	73 - 108	33	36% F	68	7.40741	68	59 - 79
118B	Sakamoto	2016	Journal of Neurological Sciences	Journal Article	2014-01-01	03/2015 - 08/2015	6	Uncontrolled Pre/Post	COMB	13	7, 8, 12	3	Limited MRI sequences	HT	Neurology	N	Y	SC		Japan	N	CI	33	36% F	68	7.40741	68	59 - 79	21	38% F	54	10.3704	54	41 - 75
123	Tansini	2016	Arquivos de neuro-psiquiatria	Journal Article	2010-11-01	11/2010 - 6/2013	32	Controlled Pre/Post	NTGT	12			Neurology Unit (vs. ER)	HC	Neurology	N	N	SC		Brazil	N	SI	71	?	45	10.9259	45	31.5 - 61	79		37	12.4074	37	26 - 49.5
128	Zinkstok	2016	PLOS One	Journal Article	2000-01-01	01/2000 - 12/2012	138	Uncontrolled Pre/Post	COMB	13	1, 2, 3, 4, 5, 6, 7, 9	8		HT	Emergency	C	Y	SC		Netherlands	N	CI	100	46% M	75	16.6667	75	60 - 105	373	57.1% M	28	6.2963	28	20 - 37
164	Zuckerman	2016	Surg. Neurol Int.	Journal Article	2012-01-01	01/2012 - 11/2013	23	Uncontrolled Pre/Post	STTL	13	2, 4, 5	3		HT	Neurology	C	N	SC		USA	N	SI	13	?	62.5	44.9	62.5	17.6 - 107.5	14	?	43.5	21.5	43.5	22 - 65
141	Candelaresi	2017	Neurological Science	Journal Article	2013-01-01	01/2013 - 12/2015	36	Uncontrolled Pre/Post	COMB	13	2, 3, 5, 6, 7, 8	6		HC	Emergency	N	Y	SC		Italy	N	CI	23	47.8% F	103	15.5556	103	78 - 120	48	54.2% F	56	14.0741	56	37 - 75
150	Hansen	2017	Clinical Neurology and Neurosurgery	Journal Article	2013-12-01	12/2013 - 11/2015	24	RCT	NTGT	12			MRI (treatment) vs CT (control), cross-overs excluded	HT	Neurology	N	N	SC		Denmark	N	SI	70	?	22	4.81481	22	15.5 - 28.5	30	?	32	14.4444	32	12.5 - 51.5
151	Hebant	2017	Revue Neurologique	Journal Article	2015-01-01	01/2015 - 12/2015	12	Uncontrolled Pre/Post	COMB	13	3, 12	2	Mobile intra-hospital stroke team	HT	Neurology	N	N	SC		France	N	CI	62	63% M	82	10.7407	82	66 - 95	33	58% M	55	6.2963	55	49 - 66
152	Hillen	2017	Journal of Stroke & Cerebrov. Dis.	Journal Article	2009-09-01	09/2009 - 03/2011	19	Uncontrolled Pre/Post	COMB	13	2, 11	2		HC	Neurology	N	N	SC		USA	N	CI	23	10 F	66.7	18.8	61.5	40.7 - 80.3	30	14 F	68.6	31.2	58	N/A
154	Iglesias Mochendaro	2017	Journal of Stroke & Cerebrov. Dis.	Journal Article	2014-02-01	02/2014 - 12/2014	11	Uncontrolled Pre/Post	COMB	13	6, 7	2		HT	Neurology	N	Y	SC		Spain	N	CI	239	??	52	10	52	43 - 70	231	52.6% M	40	7.03704	40	32 - 51
156	Jeon	2017	Journal of Stroke	Journal Article	2015-01-01	01/2015 - 08/2016	32	Uncontrolled Pre/Post	COMB	13	1,7, 9	3		HC	Neurology	N	Y	SC		Korea	N	CI	33	6% M	47	8.40741	47	35.3 - 58.0	28	9.4% M	20.5	6.18519	20.5	15.8 - 32.5
158	Mainali	2017	Journal of Stroke and Cerebrovascular Disease	Journal Article	2014-05-01	05/2014 - 10/2014	6	Uncontrolled Pre/Post	COMB	13	2, 11	2		HT	Emergency	N	N	SC		USA	N	CI	32	?	149.6	234	149.6	0 - 383.6	25	?	43.5	18.1	43.5	25.4 - 61.6
182	Rech	2017	Annals of Pharmacotherapy	Journal Article	2011-01-01	01/2011 - 12/2015	60	Uncontrolled Pre/Post	NTGT	12			PharmD at bedside during stroke treatment pathway	HT	Emergency	P	N	SC		USA	N	SI	80	55% M	73	14.6296	73	58 - 97.5	45	51.5% M	48	10.7407	48	36 - 65
179	Rhew	2017	Journal of Emergency Nursing	Journal Article	2015-11-01	11/2015 - 08/2016	10	Uncontrolled Pre/Post	FEED	11				HC	Emergency	P	N	SC		USA	N	SI	3	33.3% F	111	26.1	111	84.9 - 137.1	4	50% F	76	1.22	76	74.78 - 77.22
178	Ruff	2017	Neurology Clinical Practice	Journal Article	2010-01-01	01/2010 - 08/2015	68	Uncontrolled Pre/Post	NTGT	12			Simluation / Bootcamp for Neurology residents	HT	Neurology	N	N	SC		USA	N	SI	72	36.1% F	79	14.0741	79	66 - 104	98	57.1% F	58	12.2222	58	39 - 72
167	Zaidi	2017	Journal of Neurointerventional Surgery	Journal Article	2015-01-01	01/2015 - 12/2015	12	Controlled Pre/Post	STTL	2				HT	Neurology	C/P	Y	MC	2	USA	N	SI	142	50% F	75	12.963	75	60 - 95	109	56% F	46	10	46	28 - 55
165	Zhou	2017	Neuropsychiatric Disease and Treatment	Journal Article	2015-03-01	03/2015 - 03/2016	13	Controlled Pre/Post	COMB	13	2, 3, 12	3	New position for Stroke-care coordinator, NIHSS evaluation, Stroke Unit Nurse activation	HC	Neurology	N	N	SC		China	N	CI	88	58.3% M	100.43	6.05	100.43	94.38 - 106.48	231	57.0% M	55.68	3.62	55.68	52.06-59.30
6400	Qin	2018	Neurological sciences	Journal Article	2015-12-01	12/2015 - 04/2016	5	Uncontrolled Pre/Post	NTGT	12			Not waiting for coagulation results before administering thrombolytic therapy	HC	Neurology	N	N	SC		China	N	SI	81	60.5% M	61.7	27.3	61.7	34.4 - 89	120	58.3% M	41.9	26.6	41.9	15.3 - 68.5
6590	Rotanski	2017	The Neurohospitalist	Journal Article	2013-01-01	01/2013 - 06/2016	42	Uncontrolled Pre/Post	FEED	11				HT	Neurology	N	Y	SC		USA	N	SI	171	39.8% M	54	9.25926	54	45 - 70	102	49.0% M	49	14.8148	49	37 - 77
6620	Zhao	2018	Journal of clinical nursing	Journal Article	2012-01-01	01/2012-12/2014	36	Uncontrolled Pre/Post	NTGT	12			24/7 Availability of Emergency Thrombolysis Treatment	HC	Emergency	N	N	SC		China	N	SI	36	58.3% M	81	7.77778	81	73 - 94	90	57.8% M	42	7.77778	42	30 - 51
6668	Wu	2018	Frontiers in neurology	Journal Article	2012-01-01	01/2012 - 04/2017	36	Uncontrolled Pre/Post	COMB	13	1, 9	2		HC	Emergency	N	Y	SC		New Zealand	N	CI	142	?	87	14.0741	87	68 - 106	119	?	61	15.5556	61	41 - 83
6668	Wu	2018	Frontiers in neurology	Journal Article	2014-04-01	04/2017 - 12/2017	8	Uncontrolled Pre/Post	DTCT	5				HC	Emergency	N	Y	SC		New Zealand	N	SI	119	?	61	15.5556	61	41 - 83	46	?	34	5.55556	34	28 - 43
6688	Gurav	2018	Indian journal of critical care medicine : peer-reviewed, official publication of Indian Society of Critical Care Medicine	Journal Article	2015-01-01	01/2015 - 12/2016	24	Controlled Pre/Post	RTPR	3				HC	Emergency	N	Y	SC		India	N	SI	44	20.5% F	104.95	41.06	104.95	63.89 - 146.01	65	20% F	67.28	36.54	67.28
6706	Tahtali	2017	PloS one	Journal Article	2015-01-01	01/2015 - 12/2015	12	Uncontrolled Pre/Post	COMB	13	10, 12	2	Simulation Training	HC	Neurology	C/P	N	MC	7	Germany	N	CI	122	?	43	11.1852	43	29.8 - 60	122	?	31	6.66667	31	24 - 42
6711	Tan	2018	Journal of stroke and cerebrovascular diseases : the official journal of National Stroke Association	Journal Article	2014-01-01	01/2014 - 02/2016	25	Controlled Pre/Post	COMB	13	1, 3, 5, 7	4		HC	Emergency	N	N	SC		Singapore	N	CI	129	?	84	47	84	37 - 121	137	?	69	33	69	36 - 102
6711	Tan	2018	Journal of stroke and cerebrovascular diseases : the official journal of National Stroke Association	Journal Article	2015-03-01	03/2015 - 02/2017	24	Controlled Pre/Post	COMB	13	8, 9	2		HC	Emergency	N	N	SC		Singapore	N	CI	137	?	69	33	69	36 - 102	144	?	59	37	59	22 - 96
6714	Haesebaert	2018	Stroke	Journal Article	?	?		RCT	COMB	13	2, 12	2		HC	Emergency	N	N	MC	18	France	N	CI	328	43.6% F	94.8	20.2963	94.8	73.8 - 127.8	363	48.8% F	96	18.2222	96	75 - 124.2
6914	Sadeghi-Hokmabadi	2018	Future Neurology	Journal Article	2013-01-01	01/2013 - 12/2016	48	Uncontrolled Pre/Post	PREH	1				HT	Emergency	N	N	SC		Azerbaijan	N	SI	115	55.0% M	70	15.5556	70	53 - 95	131	57.4% M	42	8.14815	42	34 - 56
6917	Zhang	2018	Aging and Disease	Journal Article	2015-03-01	03/2015 - 02/2016	12	Uncontrolled Pre/Post	PREH	1				HT	Emergency	N	Y	SC		China	N	SI	36	38.9% F	51.9	23.8	51.9	28.1 - 75.7	41	41.5% F	41.3	10.7	41.3	30.6 - 52
3	Ye	2019	Stroke and Vascular Neurology	Journal Article	01/2016	01/2016 - 12/2017	24	Uncontrolled Pre/Post	NTGT	12			Algorithm + Protocol	HC	Emergency	N	Y	MC		China	N	SI	568	??	71.5	52.8889	71.5	27.7 - 115.3	802	?	51.5	38.1481	51.5	24.7 - 78.3
11	Vanhoucke	2019	Acta Clinica Belgica	Journal Article	08/2016	08/2016 - 07/2017	12	Uncontrolled Pre/Post	RTPR	3				HT	Emergency	N	N	SC		Belgium	N	SI	39	50.9% F	57	41.4815	57	43 - 69	29	36.6% F	33	25.9259	33	25 - 45
23	Qin	2019	Chinese Critical Care Medicine	Journal Article	07/2016	07/2016 - 12/2018	30	Uncontrolled Pre/Post	NTGT	12			Lean methodology for stroke pathway revision	HC	Emergency	N	N	SC		China	N	SI	30	16 F	63.03	19.63	63.03	36.53 - 89.53	32	14 F	39.56	11.12	39.56	24.548 - 54.572
24	Puri	2019	Neurology India	Journal Article	09/2014	09/2014 - 08/2015	12	Uncontrolled Pre/Post	NTGT	12			Education on stroke treatment efficacy	HT	Emergency	N	N	SC		India	N	SI	10	33.93% F	142	49.7	142	74.905-209.095	16	31.78% F	63.7	25.1	63.7	29.815 - 97.585
39	Klingner	2019	Journal of Stroke and Cerebrovascular Disease	Journal Article	01/2017	01/2015 - 12/2017	36	Uncontrolled Pre/Post	NTGT	12				HT	Neurology	N	N	SC		Germany	N	SI	81	49% F	36.7	22.7	36.7	6.055	97	51% F	28.3	14.3	28.3	8.695 - 47.305
42	Kamal	2019	Canadian Journal of Neurological Sciences	Journal Article	07/2007	07/2007 - 12/2017	125	Uncontrolled Pre/Post	COMB	13	1, 5, 9, 10	4		HC	Neurology	N	N	SC		Canada	N	SI	165	??	88	68.1481	88	77 - 107	104	?	30	23.3333	30	22 - 41
53	Han	2019	Hong Kong Journal of Emergency Medicine	Journal Article	06/2016	06/2016 - 12/2016	7	Uncontrolled Pre/Post	COMB	13	1, 3, 5, 7, 9			HC	Emergency	N	Y	SC		Korea	N	CI	198	125M	46	31.1111	46	33.5 - 50.5	49	?	23	16.963	23	16 - 29.8
59	Gilbert	2019	Journal of the American College of Clinical Pharmacology	Journal Article	05/2017	05/2017 - 05/2018	12	Uncontrolled Pre/Post	NTGT	12			Clinical pharmacist presence	HT	Emergency	P	N	SC		USA	N	SI	33	33% M	63		60	36 - 109	33	51% M	49	35.5556	47	22 - 74
72	Bhatt	2019	The Neurohospitalist	Journal Article	01/2013	01/2013 - 04/2016	40	Uncontrolled Pre/Post	COMB	13	1, 5, 9, 10	4		HT	Emergency	N	Y	SC		USA	N	CI	148	44% F	59	48.8889	59	52 -80	126	0.44	29	22.5926	29	20 - 41
79	Ajmi	2019	BMJ Quality and Safety	Journal Article	02/2017	02/2017 - 03/2018	13	Uncontrolled Pre/Post	COMB	13	3, 5, 6, 7, 9, 10	6		HT	Emergency	N	Y	SC		Norway	N	CI	399	??	27	21.8182	27	19 - 41	190	?	13	11.8519	13	9 - 23
87	Wang	2018	Chinese Critical Care Medicine	Journal Article	06/2016	06/2016 - 12/2017	19	Uncontrolled Pre/Post	PREH	1				HC	Emergency	N	Y	SC		China	N	SI	70	20% F	78.03	21.04	78.03	49.626 - 106.434	42	21.4% F	62	11.07	62	47.0555 - 76.9445
99	Shen	2018	Academic Journal of Second Military Medical University	Journal Article	08/2016	08/2016 - 06/2018	22	Uncontrolled Pre/Post	NTGT	12			Informationized Time Tracking Management	HC	Emergency	N	N	SC		China	N	SI	112	63.1% M	33	24.4444	33	23 - 43	122	64.3% M	27	21.8519	27	23 - 36
x.100	Sablot	2018	Cerebrovascular Disease	Journal Article	02/2015	02/2015 - 02/2017	12	Uncontrolled Pre/Post	COMB	13	1, 3, 4, 5, 6, 9, 10	7		HC	Emergency	P	N	SC		France	N		135	45.9% F	84	40	84	26 - 134	73	55.2% F	65	44	65	5.6 - 124.4
x.110	Nguyen-Huynh	2018	Stroke	Journal Article	09/2015	09/2015 - 01/2016	5	Controlled Pre/Post	COMB	13	1, 2, 3, 5, 6, 7, 9, 10, 12	9	Medical history review	HC	Emergency	C	Y	MC	21	USA	Y	CI	310	50.3% F	63.2	31.2	53.5	42 - 73	557	53.0% F	41.8	30.6	34	26 - 45
x.113	McGrath	2018	BMJ Open Quality	Journal Article	07/2015	07/2015 - 12/2016	18	Uncontrolled Pre/Post	COMB	13	1, 5, 7, 12	4	Integrated pathway	HT	Emergency	N	Y	SC		Ireland	N	CI	17	??	99	107.778	99	52 - 239	29	?	82.5	86.6667	82.5	24 - 210
x.126	Iglesias Mochendaro	2018	Neurologia	Journal Article	01/2009	01/2009 - 04/2017	94	Uncontrolled Pre/Post	COMB	13	3, 6, 9, 12	4	Medical history review	HC	Emergency	N	Y	SC		Spain	N	SI	239	56.5% M	52	41.8519	52	43 - 70	220	56.1% M	34	27.037	34	28 - 45
x.129	Hsaio	2018	Journal of the Chinese Medical Association	Journal Article	01/2011	01/2011 - 12/2014	48	Uncontrolled Pre/Post	RTPR	3				HC	Neurology	N	Y	SC		China	N	SI	58	??	125	45	125	64.25 - 185.75	58	?	63	23	63	31.95 - 94.05
x.131	Hebant	2018	Journal of the Neurological Sciences	Journal Article	01/2013	01/2013 - 12/2016	48	Uncontrolled Pre/Post	RTPR	3				HC	Neurology	N	Y	SC		France	N	SI	69	49% M	75	56.6667	75	63 - 90	83	61% M	54	41.4815	54	46 - 66
x.146	Acar	2018	Northern Clinics of Instanbul	Journal Article	01/2015	01/2015 - 08/2017	48	Uncontrolled Pre/Post	NTGT	12			Education and motivational meetings	HC	Emergency	N	N	SC		Turkey	N	SI	3	??	121.6	33.9	121.6	75.835 - 167.365	5	?	96	7.8	96	85.47 - 106.53
x.169	Egi	2015	Cerebrovascular Diseases Extra	Journal Article	10/2012	10/2012 - 06/2014	20	Uncontrolled Pre/Post	COMB	13	1, 3, 12		Coordination of patients	HT	Emergency	N	Y	SC		Hungary	N	SI	19	??	88	25.17	88	54.02 - 121.9795	32	?	71	27.87	71	33.3755 - 108.6245
Supplementary Table 2: Quality Assessment for Observational Pre/Post Studies Using the NIH Study Quality Assessment Tool for Before-After (Pre-Post) Studies
Study Code	First Author	Journal	Publication Type	Study Type	Overall Rating	Was the research question or objective in this paper clearly stated?	Was the study population clearly specified and defined?	Were the participants in the study representative of those who would be eligible for the test/service/intervention in the general or clinical population of interest?	Were all eligible participants that met the prespecified entry criteria enrolled?	Was the sample size sufficiently large to provide confidence in the findings?	Was the test/service/intervention clearly described and delivered consistently across the study population?	Were the outcome measures clearly defined, valid, reliable, and implemented consistently across all study participants?	Were the outcome assessors blinded to the exposure status of participants?	Was loss to follow-up after baseline 20% or less?	Did the statistical methods examine changes in outcome measures from before to after the intervention? Were statistical tests done that provided p values for the pre-to-post changes?	Were outcome measures of interest taken multiple times before the intervention and multiple times after the intervention (i.e., did they use an interrupted time-series design)?	If the intervention was conducted at a group level (e.g., a whole hospital, a community, etc.) did the statistical analysis take into account the use of individual-level data to determine effects at the group level?
820	Sung	Stroke Research and Treatment	Journal Article	Uncontrolled Pre/Post	Fair; No measure for confounds	Yes	Yes	Yes	Yes	Yes	Yes	Yes	No	Yes	Yes	No	No
823	Bae	Journal of Clinical Neurology	Journal Article	Uncontrolled Pre/Post	Fair; No measure for confounds	Yes	Yes	Yes	Yes	No	Yes	Yes	No	Yes	Yes	No	No
832	Chen	PLOS One	Journal Article	Uncontrolled Pre/Post	Fair; No measure for confounds	Yes	Yes	Not described	Yes	No	Yes	Yes	No	Yes	Yes	No	No
846	Shah	Neurology	Journal Article	Uncontrolled Pre/Post	Good; Blinding innappropriate for study type	Yes	Yes	Yes	Yes	Yes	Yes	Yes	No	Yes	No	Yes	Yes
855	Ashkenazi	Medicine (Baltimore)	Journal Article	Uncontrolled Pre/Post	Fair; No measure for confounds	Yes	Yes	Yes	Yes	No	Yes	Yes	No	Yes	Yes	No	No
862	Sohn	Journal of Stroke & Cerebrov. Dis.	Journal Article	Uncontrolled Pre/Post	Good; Blinding innappropriate for study type	Yes	Yes	Yes	Yes	Yes	Yes	Yes	No	Yes	Yes	No	Yes
865	Kendall	Emergency Medicine Journal	Journal Article	Uncontrolled Pre/Post	Poor; not all data initially reported, no measure for confounds	Yes	Somewhat	Yes	Yes	Yes	Somewhat	Yes	No	Yes	No	Yes	No
869	Willeit	Lancet Neurology	Journal Article	Uncontrolled Pre/Post	Fair; Some data missing, no consideration of confounds	Yes	Yes	Yes	Yes	No	Yes	Yes	No	Yes	No	Yes	No
874	Hsieh	Journal of the Formosan Medical Association	Journal Article	Uncontrolled Pre/Post	Fair; No measure for confounds, somewhat confusing presentation of research question	Yes	Yes	Not described	Yes	Yes	Yes	Yes	No	Yes	No	No	No
876	Van Schaik	Journal of Stroke & Cerebrov. Dis.	Journal Article	Uncontrolled Pre/Post	Good; Blinding innappropriate for study type, no measure for confounds but otherwise good	Yes	Yes	Yes	Yes	Yes	Yes	Yes	No	Yes	Yes	Yes	No
879	Burnett	Stroke	Journal Article	Uncontrolled Pre/Post	Fair; No measure for confounds	Yes	Yes	Not described	Yes	Yes	Yes	Yes	No	Yes	Yes	No	No
884	Thortveit	Acta Neurologica Scandinavica	Journal Article	Uncontrolled Pre/Post	Poor; No measure for confounds, missing significant data	Yes	Yes	Yes	Yes	Yes	Yes	Yes	No	Yes	Yes	Yes	No
929	Ruff	Stroke	Journal Article	Uncontrolled Pre/Post	Fair; No measure for confounds	Yes	Yes	Yes	Yes	Yes	Yes	Yes	No	Yes	Yes	Yes	No
987	Casolla	Journal of Neurology	Journal Article	Uncontrolled Pre/Post	Fair; No measure for confounders	Yes	Yes	Yes	Yes	No	Yes	Yes	No	Yes	Yes	No	No, but confounders were acknowledged
995	Tai	Internal Medicine Journal	Journal Article	Uncontrolled Pre/Post	Fair	Yes	Yes	Yes	Yes	No	Yes	Yes	No	Yes	Yes	No	No, but confounders were acknowledged
996	Ford	Stroke	Journal Article	Controlled Pre/Post	Fair	Yes	Yes	Yes	Yes	No	Yes	Yes	No	Yes	Yes	No	No
1003	Ghrooda	Canadian Journal of Neurological Sciences	Journal Article	Uncontrolled Pre/Post	Poor; outcome data poorly defined	Yes	Yes	Yes	Yes	No	Yes	No	No	Yes	Yes	Yes	No
1015	Meretoja	Neurology	Journal Article	Uncontrolled Pre/Post	Fair; No measure for confounders	Yes	Yes	Yes	Yes	Yes	Yes	Yes	No	Yes	Yes	Yes	No
1106	Puolakka	Academic Emergency Medicine	Journal Article	Uncontrolled Pre/Post	Fair; No measure for confounders	Yes	Yes	Yes	Yes	Yes	Yes	Yes	No	Yes	Yes	Yes	No
1108	Heo	Stroke	Journal Article	Uncontrolled Pre/Post	Fair; No measure for confounds, study period may be too short	Yes	Yes	Yes	Yes	Yes	Yes	Yes	No	Yes	Yes	No	No
1119	Yoo	Journal of the Neurological Sciences	Journal Article	Controlled Pre/Post	Fair; No measure for confounds	Yes	Yes	Yes	Yes	Yes	Yes	Yes	No	Yes	Yes	No	No
1134	Kim	European Journal of Neurology	Journal Article	Uncontrolled Pre/Post	Fair; No measure for confounds	Yes	Yes	Yes	Yes	Yes	Yes	Yes	No	Yes	Yes	No	No
1151	Tveiten	Emergency Medicine Journal	Journal Article	Uncontrolled Pre/Post	Poor; low N throughout - data should have been pooled longer	Yes	Yes	Yes	Yes	Yes	Yes	Yes	No	Yes	Yes	Yes	No
1162	Nazir	Journal of Clinical Neuroscience	Journal Article	Uncontrolled Pre/Post	Fair	Yes	Yes	Yes	Yes	Yes	Yes	Yes	No	Yes	Yes, but data unclear	Yes	No
1223	Lindsberg	Neurology	Journal Article	Uncontrolled Pre/Post	Fair; Most data present, though no adjustment for confounds	Yes	Yes	Yes	Yes	Yes	Yes	Sex data missing	No	Yes	Yes	Yes	No
1224	Mehdiratta	Canadian Journal of Neurological Sciences	Journal Article	Controlled Pre/Post	Fair; Most data present, though no adjustment for confounds	Yes	Yes	Yes	Yes	Yes	Yes	Sex data missing	No	Yes	Yes	Yes	No
2976	Moran	Journal of Stroke & Cerebrov. Dis.	Journal Article	Uncontrolled Pre/Post	Fair; Confounders acknowledged though no reflection in statistical data	Yes	Yes	Yes	Yes	Yes	Yes	Yes	No	Yes	Yes	No	No, but confounders acknowledged
3145	Bhatt	The Neurohospitalist	Journal Article	Uncontrolled Pre/Post	Fair; No measure for confounds	Yes	Yes	Yes	Yes	Yes	Yes	Yes	No	Yes	Yes	No	No
3472	Prabhakaran et al	Circulation. Cardiovascular Quality & Outcomes	Journal Article	Controlled Pre/Post	Fair; No measure for confounds	Yes	Yes	Yes	Yes	Yes	Yes	Yes	No	Yes	Yes	No	No
3477	Zaidi et al	Journal of Neurointerventional Surgery	Journal Article	Uncontrolled Pre/Post	Fair; No measure for confounds	Yes	Yes	Yes	Yes	Yes	Yes	Yes	No	Yes	Yes	No	No
3480	Liang et al	Australasian Physical and Engineering Sciences	Journal Article	Uncontrolled Pre/Post	Fair; No measure for confounds	Yes	Yes	Yes	Yes	Yes	Yes	Yes	No	Yes	Yes	No	No
3486	Belt et al	Stroke	Journal Article	Uncontrolled Pre/Post	Fair; No measure for confounds	Yes	Yes	Yes	Yes	Yes	Yes	Sex data missing	No	Yes	Yes	No	No
3493	Kim et al	Journal of Stroke & Cerebrov. Dis.	Journal Article	Uncontrolled Pre/Post	Fair; No measure for confounds	Yes	Yes	Yes	Yes	Yes	Yes	Yes	No	Yes	Yes	No	No
3498	Ibrahim et al	Journal of Stroke & Cerebrov. Dis.	Journal Article	Uncontrolled Pre/Post	Fair; No measure for confounds	Yes	Yes	Yes	Yes	Yes	Yes	Yes	No	Yes	Yes	No	No
3499	de Seabra Marto et al	Journal of Stroke & Cerebrov. Dis.	Journal Article	Uncontrolled Pre/Post	Fair; No measure for confounds	Yes	Yes	Yes	Yes	Yes	Yes	Yes	No	Yes	Yes	No	No
3509	Puy et al	American Journal of Emergency Medicine	Journal Article	Uncontrolled Pre/Post	Fair; No measure for confounds	Yes	Yes	Yes	Yes	Yes	Yes	Yes	No	Yes	Yes	No	No
3516	Kamal et al	Circulation, Cardiovascular Quality & Outcomes	Journal Article	Uncontrolled Pre/Post	Good; Method for confound adjustment not explicitly described however	Yes	Yes	Yes	Yes	Yes	Yes	Yes	No	Yes	Yes	No* (before/after for phase specific)	Yes
3516	Kamal et al	Circulation, Cardiovascular Quality & Outcomes	Journal Article	Uncontrolled Pre/Post	Good; Method for confound adjustment not explicitly described however	Yes	Yes	Yes	Yes	Yes	Yes	Yes	No	Yes	Yes	No* (before/after for phase specific)	Yes
3527	Chen et al	Canadian Journal of Neurological Sciences	Journal Article	Uncontrolled Pre/Post	Fair; Confounders acknowledged though no reflection in statistical data	Yes	Yes	Yes	Yes	Yes	Yes	Yes	No	Yes	Yes	Yes	No, but confounders acknowledged
92	Busby	Journal of Neurointerventional Surgery	Journal Article	Uncontrolled Pre/Post	Fair; No measure for confounds	Yes	Yes	Yes	Yes	Yes	Yes	Yes	No	Yes	Yes	No	No, but confounders acknowledged
100	Heikkila	Scandanavian Journal of Trauma, Resuscitation and Emergency Medicine	Journal Article	Uncontrolled Pre/Post	Poor; low n, no consideration of confounds	Yes	Somewhat	Yes	Yes	Yes	Yes	No, n data incomplete, Sex data missing	No	Yes	Yes	Yes	No
87	Hsieh	PLOS One	Journal Article	Uncontrolled Pre/Post	Fair; No measure for confounders	Yes	Yes	Yes	Yes	Likely, but n not explicitly described	Yes	No, tPA patient numbers missing	No	Yes	Yes	Yes	No
101	Hsieh	Scandanavian Journal of Trauma, Resuscitation and Emergency Medicine	Journal Article	Uncontrolled Pre/Post	Fair; No measure for confounders	Yes	Yes	Yes	Yes	Yes	Yes	Yes	No	Yes	Yes	No	No, but confounders acknowledged
102	Huang	PLOS One	Journal Article	Controlled Pre/Post	Fair; No measure for confounders	Yes	Yes	Yes	Yes	Yes	Yes	Yes	No	Yes	Yes	No	No
118A	Sakamoto	Journal of Neurological Sciences	Journal Article	Uncontrolled Pre/Post	Fair; No measure for confounders	Yes	Yes	Yes	Yes	Yes	Yes	Yes	No	Yes	Yes	No	No
118B	Sakamoto	Journal of Neurological Sciences	Journal Article	Uncontrolled Pre/Post	Fair; No measure for confounders	Yes	Yes	Yes	Yes	Yes	Yes	Yes	No	Yes	Yes	No	No
123	Tansini	Arquivos de neuro-psiquiatria	Journal Article	Controlled Pre/Post	Fair; No measure for confounders, some non-essential data missing	Yes	Somehwat	Yes	Yes	Yes	Yes	Sex data missing, group characteristics limited	No	Yes	Yes	No	No
128	Zinkstok	PLOS One	Journal Article	Uncontrolled Pre/Post	Fair; No measure for confounders, some non-essential data missing	Yes	Yes	Yes	Yes	Yes	Yes	Yes	No	Yes	Yes	No	No
164	Zuckerman	Surg. Neurol Int.	Journal Article	Uncontrolled Pre/Post	Fair; No measure for confounders, some non-essential data missing	Yes	Yes	Yes	Yes	Yes	Yes	Yes	No	Yes	Yes	Yes	No
141	Candelaresi	Neurological Science	Journal Article	Uncontrolled Pre/Post	Poor; missing key data, no consideration of confounds	Yes	Somewhat	Yes	Yes	Yes	Yes	No, n data incomplete, sex data missing	No	Yes	Yes	No	No
151	Hebant	Revue Neurologique	Journal Article	Uncontrolled Pre/Post	Fair; No measure for confounders	Yes	Yes	Yes	Yes	Yes	Yes	Yes	No	Yes	Yes	No	No
152	Hillen	Journal of Stroke & Cerebrov. Dis.	Journal Article	Uncontrolled Pre/Post	Poor; low n, missing key data, no consideration of confounds	Yes	Yes	Yes	Yes	Yes	No	No. Standard Deviation data missing	No	Yes	Yes	No	No
154	Iglesias Mohedano	Journal of Stroke & Cerebrov. Dis.	Journal Article	Uncontrolled Pre/Post	Poor; missing key data, no consideration of confounds	Yes	Yes	Yes	Yes	Yes	No	No. Initial data set missing	No	Yes	Yes	No	No
156	Jeon	Journal of Stroke	Journal Article	Uncontrolled Pre/Post	Fair; No measure for confounders	Yes	Yes	Yes	Yes	Yes	Yes	Yes	No	Yes	Yes	No	No
158	Mainali	Journal of Stroke and Cerebrovascular Disease	Journal Article	Uncontrolled Pre/Post	Fair; No measure for confounders	Yes	Yes	Yes	Yes	Yes	No	Yes	No	Yes	Yes	No	No
182	Rech	Annals of Pharmacotherapy	Journal Article	Uncontrolled Pre/Post	Good	Yes	Yes	Yes	Yes	Yes	Unclear as to PharmD presence duration / treatment	Yes	No	Yes	Yes	No	Yes
179	Rhew	Journal of Emergency Nursing	Journal Article	Uncontrolled Pre/Post	Fair; No measure for confounders	Yes	No	Yes	Yes	Yes	No	Yes	No	Yes	Yes	No	No
167	Zaidi et al	Journal of Neurointerventional Surgery	Journal Article	Controlled Pre/Post	Fair; No measure for confounders	Yes	Yes	Yes	Yes	Yes	Yes	Yes	No	Yes	Yes	No	No, but confounders acknowledged
165	Zhou	Neuropsychiatric Disease and Treatment	Journal Article	Controlled Pre/Post	Fair; No measure for confounders	Yes	Yes	Yes	Yes	Yes	Yes	Yes	No	Yes	Yes	No	No
178	Ruff	Neurology Clinical Practice	Journal Article	Uncontrolled Pre/Post	Fair; No measure for confounders	Yes	Yes	Yes	Yes	Yes	Yes	Yes	No	Yes	Yes	No	No
6400	Qin	Neurological sciences	Journal Article	Uncontrolled Pre/Post	Good	Yes	Yes	Yes	Yes, except when contraindicated to normal therapy	Yes	Yes	Yes	No	Yes	Yes	No	Yes
6590	Rotanski	The Neurohospitalist	Journal Article	Uncontrolled Pre/Post	Poor; missing key data regarding patient enrolment	Yes	Yes	Unclear	Unclear	Yes	Yes (no significant difference for potential confounding factors)	Yes	No	Unknown	Yes	No	Yes
6620	Zhao	Journal of clinical nursing	Journal Article	Uncontrolled Pre/Post	Fair; No measure for individual-level data or confounders	Yes	Yes	Yes	Yes	Yes	Yes	Yes	No	Yes	Yes	Yes	No
6668	Wu	Frontiers in neurology	Journal Article	Uncontrolled Pre/Post	Fair; No measure for individual-level data or confounders	Yes	Yes	Yes	Yes	Yes	Yes	Yes	No	Yes	Yes	Yes	No
6688	Gurav	Indian journal of critical care medicine : peer-reviewed, official publication of Indian Society of Critical Care Medicine	Journal Article	Controlled Pre/Post	Fair; No measure for individual-level data or confounders	Yes	Yes	Yes	Yes	Yes	Yes	Yes	No	Yes	Yes	No	No
6706	Tahtali	PloS one	Journal Article	Uncontrolled Pre/Post	Poor; Measures seem not to be implemented consistently across centres, yet results pooled? (Table 1)	Yes	Yes	Yes	Yes	Yes	Unclear	Yes	No	Yes	Yes	No	Unclear
6711	Tan	Journal of stroke and cerebrovascular diseases : the official journal of National Stroke Association	Journal Article	Controlled Pre/Post	Fair; No measure for individual-level data or confounders	Yes	Yes	Yes	Yes	Yes	Yes	Yes	No	Yes	Yes	Yes	No
6914	Sadeghi-Hokmabadi	Future Neurology	Journal Article	Uncontrolled Pre/Post	Fair; No measure for individual-level data or confounders	Yes	Yes	Yes	Yes	Yes	Yes	Yes	No	Yes	Yes	No	No
6917	Zhang	Aging and Disease	Journal Article	Uncontrolled Pre/Post	Fair; No measure for individual-level data or confounders	Yes	Yes	Yes	Yes	Yes	Yes	Yes	No	Yes	Yes	No	No
3	Ye	Stroke and Vascular Neurology	Journal Article	Uncontrolled Pre/Post	Fair; No measure for confounders	Yes	Yes	Yes	Yes	Yes	Yes	Yes	No	Yes	Yes	No	Yes
11	Vanhoucke	Acta Clinica Belgica	Journal Article	Uncontrolled Pre/Post	Fair; No objective stated	No	Yes	Yes	Yes	Yes	Yes	Yes	No	Yes	Yes	No	Yes
23	Qin	Chinese Critical Care Medicine	Journal Article	Uncontrolled Pre/Post	Poor; Low number of participants	Yes	Yes	Yes	Yes	No	Yes	Yes	No	Yes	Yes	No	N/A
24	Puri	Neurology India	Journal Article	Uncontrolled Pre/Post	Fair; No measure for confounders	Yes	Yes	Yes	Yes	Yes	Yes	Yes	No	Yes	Yes	Yes	Yes
39	Klingner	Journal of Stroke and Cerebrovascular Disease	Journal Article	Uncontrolled Pre/Post	Fair; No measure for confounders	Yes	Yes	Yes	Yes	Yes	Yes	Yes	No	Yes	Yes	Yes	Yes
42	Kamal	Canadian Journal of Neurological Sciences	Journal Article	Uncontrolled Pre/Post	Fair; No measure for confounders	Yes	Yes	Yes	Yes	Yes	Yes	Yes	No	Yes	Yes	No	Yes
53	Han	Hong Kong Journal of Emergency Medicine	Journal Article	Uncontrolled Pre/Post	Fair; Acknowledged but did not measure for confounders	Yes	Yes	Yes	Yes	Yes	Yes	Yes	No	Yes	Yes	No	Yes
59	Gilbert	Journal of the American College of Clinical Pharmacology	Journal Article	Uncontrolled Pre/Post	Poor; Low number of participants	Yes	Yes	No	Yes	No	Yes	Yes	No	Yes	Yes	No	No
72	Bhatt	The Neurohospitalist	Journal Article	Uncontrolled Pre/Post	Poor; No measure for confounders, objective and patient criteria not stated with sufficient detail	No	No	Yes	Yes	Yes	Yes	Yes	No	Yes	Yes	No	N/A
79	Ajmi	BMJ Quality and Safety	Journal Article	Uncontrolled Pre/Post	Fair; No measure for confounders, population poorly defined	Yes	No	Yes	Yes	Yes	Yes	Yes	No	Yes	Yes	No	No
87	Wang	Chinese Critical Care Medicine	Journal Article	Uncontrolled Pre/Post	Fair; No measure for confounders	Yes	Yes	Yes	Yes	Yes	Yes	Yes	No	Yes	Yes	No	N/A
99	Shen	Academic Journal of Second Military Medical University	Journal Article	Uncontrolled Pre/Post	Fair; No measure for confounders	Yes	Yes	Yes	Yes	Yes	Yes	Yes	No	Yes	Yes	No	No
x.100	Sablot	Cerebrovascular Disease	Journal Article	Uncontrolled Pre/Post	Fair; Acknowledged but did not measure for confounders	Yes	Yes	Yes	Yes	Yes	Yes	Yes	No	Yes	Yes	Yes	N/A
x.110	Nguyen-Huynh	Stroke	Journal Article	Controlled Pre/Post	Fair; Acknowledged but did not measure for confounders	Yes	Yes	Yes	Yes	Yes	Yes	Yes	No	Yes	Yes	Yes	Yes
x.113	McGrath	BMJ Open Quality	Journal Article	Uncontrolled Pre/Post	Fair; No measure for confounders	Yes	Yes	Yes	Yes	Yes	Yes	Yes	No	Yes	Yes	Yes	N/A
x.126	Iglesias Mochendaro	Neurologia	Journal Article	Uncontrolled Pre/Post	Fair; No measure for confounders	Yes	Yes	Yes	Yes	Yes	Yes	Yes	No	Yes	Yes	No	N/A
x.129	Hsaio	Journal of the Chinese Medical Association	Journal Article	Uncontrolled Pre/Post	Fair; No measure for confounders	Yes	Yes	Yes	Yes	Yes	Yes	Yes	No	Yes	Yes	Yes	N/A
x.131	Hebant	Journal of the Neurological Sciences	Journal Article	Uncontrolled Pre/Post	Fair; No measure for confounders	Yes	Yes	Yes	Yes	Yes	Yes	Yes	No	Yes	Yes	Yes	N/A
x.146	Acar	Northern Clinics of Instanbul	Journal Article	Uncontrolled Pre/Post	Poor; Low population, No measure for confounders	Yes	Yes	No	Yes	Yes	Yes	Yes	No	Yes	Yes	Yes	N/A
x.169	Egi	Cerebrovascular Diseases Extra	Journal Article	Uncontrolled Pre/Post	Poor; Low population, No measure for confounders	Yes	Yes	No	Yes	Yes	Yes	Yes	No	Yes	Yes	No	N/A
Supplementary Table 3: Quality Assessment for Randomized Control Trials Using the NIH Study Quality Assessment Tool for Controlled Intervention Studies
Study Code	First Author	Journal	Publication Type	Study Type		Quality Rating	Was the study described as randomized, a randomized trial, a randomized clinical trial, or an RCT?	Was the method of randomization adequate (i.e., use of randomly generated assignment)?	Was the treatment allocation concealed (so that assignments could not be predicted?)	Were study participants and provideres blinded to treatment group assignment?	Were the people assessing the outcomes blinded to the particpant's group assignments?	Were the groups similar at baseline on important characteristics that could affect outcomes (e.g., demographics, risk factors, co-morbid conditions)?	Was the overall drop-out rate from the study at endpoint 20% or lower of the number allocated to treatment?	Was the differential drop-out rate (between treatment groups) at endpoint 15 percentage points or lower?	Was there high adherence to the intervention protocols for each treatment group?	Were other interventions avoided or similar in the groups (e.g., similar background treatments)?	Were outcomes assessed using valid and reliable measures, implemented consistently across all study participants?	Did the authors report that the sample size was sufficiently large to be able to detect a difference in the main outcome between groups with at least 80% power?	Were outcomes reported or subgroups analyzed prespecified (i.e., identified before analyses were conducted)?	Were all randomized participants analyzed in the group to which they were originally assigned, i.e., did they use an intention-to-treat analysis?
150	Hansen	Clinical Neurology and Neurosurgery	Journal Article	RCT		Fair	Yes	Yes	No	No	No	Yes	No	Yes	Yes	Avoided	Yes	No	Reported	Yes
854	Dirks	Neurology	Journal Article	RCT		Fair	Yes	Not described	Yes	No	Yes	Yes	Yes	Yes	Yes	Avoided	Yes	Yes	Reported	Yes
3484	Saber et al	Neurology	Journal Article	RCT		Low; did not describe multiple categories	Yes	Not described	No	No	Yes	Not described	Not described	Not described	Yes	Avoided	Yes	Yes	Reported	Yes
6714	Haesebaert	Stroke	Journal Article	RCT		Good; participant blinding to treatment group assignment not possible	Yes	Yes	Yes	No	Yes	Yes	Yes	Yes	Yes	Avoided	Yes	Yes	Pre-specified (for outcome of interest)	Yes
Supplementary Table 4: Quality Assessment for Observational Pre/Post Studies Using the NIH Study Quality Assessment Tool for Systematic Reviews and Meta-Analyses
Study Code	First Author	Journal	Publication Type	Study Type		Overall Rating	1. Is the review based on a focused question that is adequately formulated and described?	2. Were eligibility criteria for included and excluded studies predefined and specified?	3. Did the literature search strategy use a comprehensive, systematic approach?	4. Were titles, abstracts, and full-text articles dually and independently reviewed for inclusion and exclusion to minimize bias?	5. Was the quality of each included study rated independently by two or more reviewers using a standard method to appraise its internal validity?	6. Were the included studies listed along with important characteristics and results of each study?	7. Was publication bias assessed?	8. Was heterogeneity assessed? (This question applies only to meta-analyses.)
1016	Lin	Circulation. Cardiovascular Quality & Outcomes	Journal Article	Database Meta-Analysis		Fair; Database meta-analysis pulled data from registry. Very high sample size, however authors recognize potential for reporting bias to the database	Yes	Yes	Yes	N/A; Database meta-analysis	N/A	Yes	No (addressed but not quatified)	N/A
